# Supplementary material for: Hierarchical 1T-MoS2 nanotubular structures for enhanced supercapacitive performance
Source: Royal Society of Chemistry journal article supplement (doi:10.1039/c7ta08115d), 2017-01-01
Supplement: c7ta08115d1.pdf [file c7ta08115d1.pdf]

Electronic Supplementary Information (ESI)

## Hierarchical 1T-MoS<sub>2</sub> Nanotubular Structures for Enhanced Supercapacitive Performance

Shuang Yang,<sup>a,‡</sup> Ke Zhang,<sup>a,b,‡</sup> Changda Wang,<sup>a</sup> Youkui Zhang,<sup>a,c</sup> Shuangming Chen,<sup>a</sup> Chuanqiang Wu,<sup>a</sup> Anthony Vasileff,<sup>b</sup> Shi Zhang Qiao<sup>b,d,\*</sup> and Li Song<sup>a\*</sup>

<sup>a</sup> *National Synchrotron Radiation Lab, CAS Center for Excellence in Nanoscience,  
University of Science and Technology of China, Hefei, Anhui 230029, China.*

<sup>b</sup> *School of Chemical Engineering, The University of Adelaide, Adelaide, South  
Australia 5005, Australia.*

<sup>c</sup> *School of National Defense Science and Technology, Southwest University of  
Science and Technology, Mianyang, Sichuan 621010, China*

<sup>d</sup> *School of Materials Science and Engineering, Tianjin University, Tianjin 300072,  
China*

\*E-mail: [s.qiao@adelaide.edu.au](mailto:s.qiao@adelaide.edu.au); [song2012@ustc.edu.cn](mailto:song2012@ustc.edu.cn)

<sup>‡</sup>S. Yang and K. Zhang contributed equally to this work

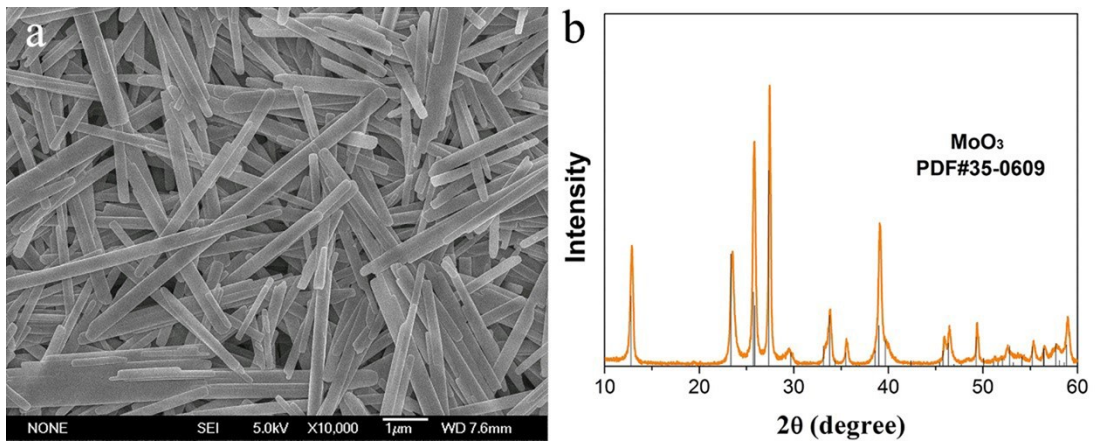

**Fig. S1** (a) SEM image and (b) XRD pattern of the as-prepared MoO<sub>3</sub> nanobelts.

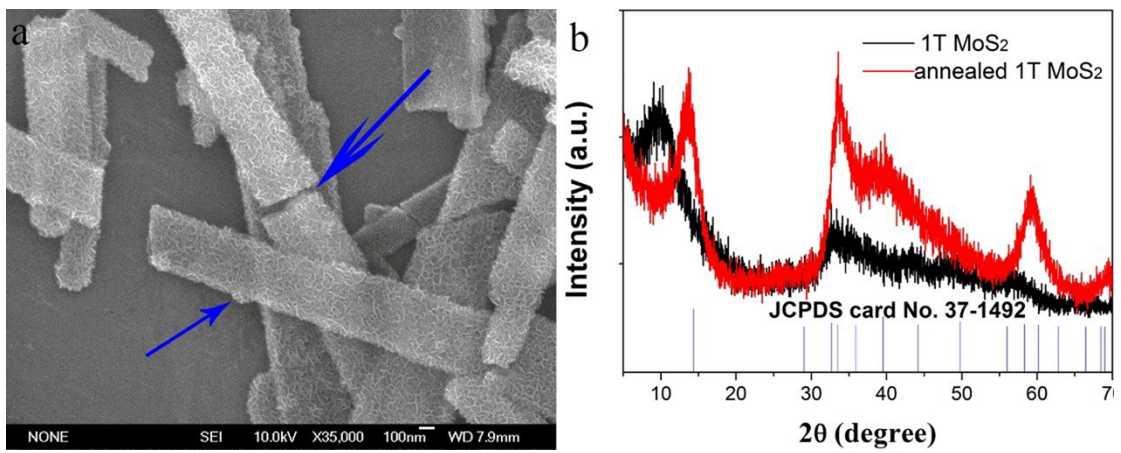

**Fig. S2** (a) SEM image of the as-prepared 1T-MoS<sub>2</sub>; (b) XRD patterns of as-prepared 1T-MoS<sub>2</sub> and annealed 1T-MoS<sub>2</sub>.

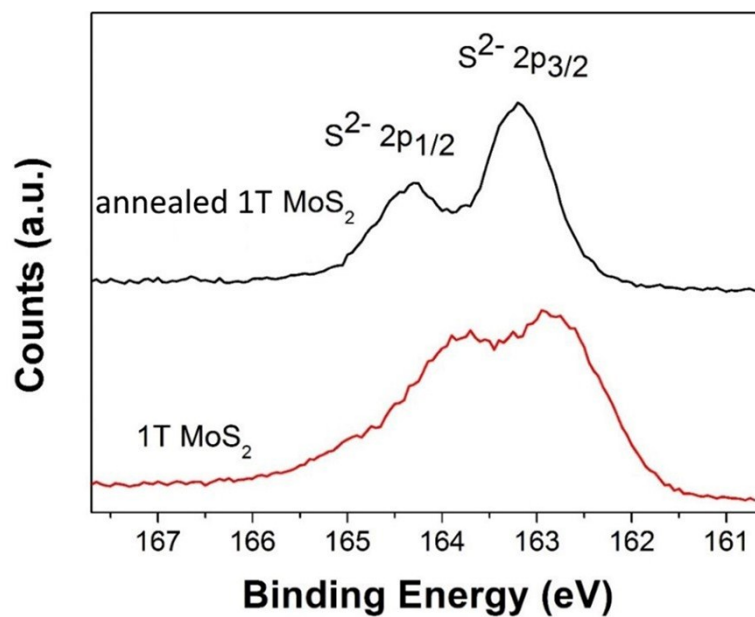

**Fig. S3** S 2p XPS spectrums of as-prepared 1T-MoS<sub>2</sub> and annealed 1T-MoS<sub>2</sub>.

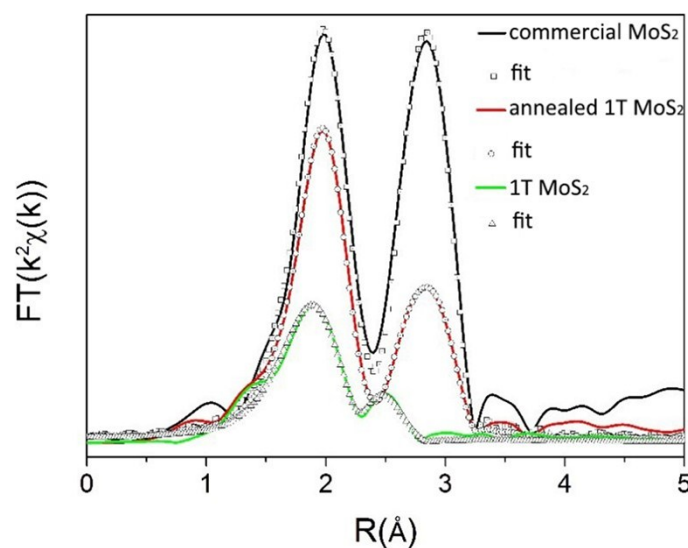

**Fig. S4** Fitting curves for EXAFS data of the Mo K-edge for commercial MoS<sub>2</sub>, annealed 1T-MoS<sub>2</sub> and as-prepared 1T-MoS<sub>2</sub>.

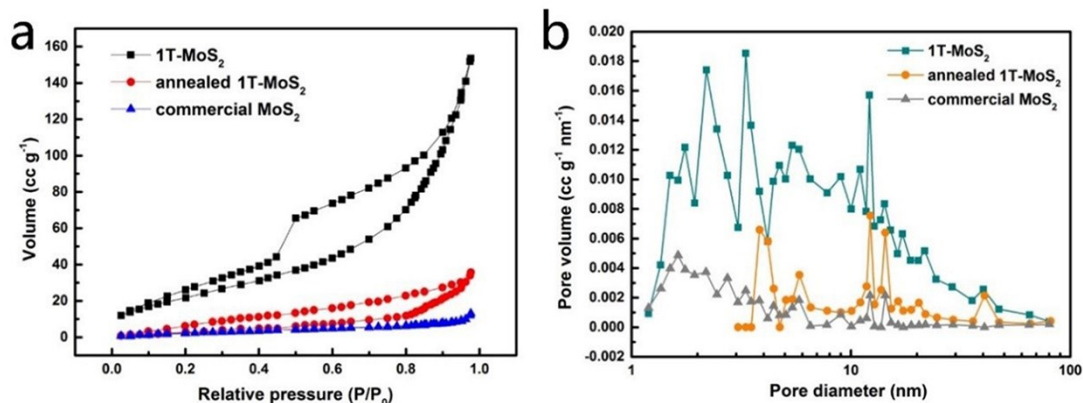

**Fig. S5** (a) Nitrogen adsorption-desorption isotherm and (b) pore diameter distribution of as-prepared 1T-MoS<sub>2</sub>, annealed 1T-MoS<sub>2</sub> and commercial MoS<sub>2</sub>.

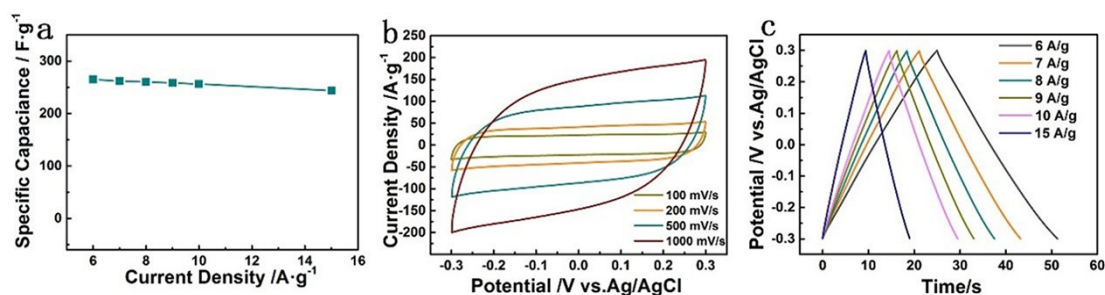

**Fig. S6** (a) Specific capacitances for a current density range from 6 to 15 A g<sup>-1</sup>, (b) CV curves for a scan rate range from 100 to 1000 mV s<sup>-1</sup>, and (c) GCD profile for a current density range from 6 to 10 A g<sup>-1</sup> for the as-prepared 1T-MoS<sub>2</sub> tested in a three-electrode system.

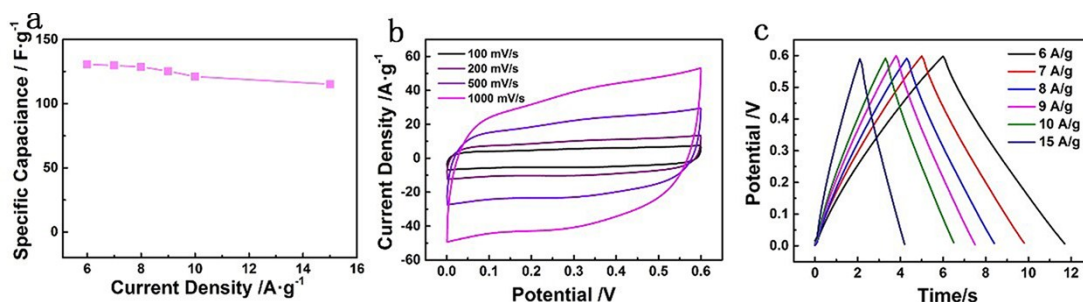

**Fig. S7** (a) Specific capacitances for a current density range from 6 to 15 A g<sup>-1</sup>, (b) CV curves for a scan rate range from 100 to 1000 mV s<sup>-1</sup>, and (c) GCD profiles for a current density range from 6 to 10 A g<sup>-1</sup> for the as-prepared 1T-MoS<sub>2</sub> tested in a two-electrode system.

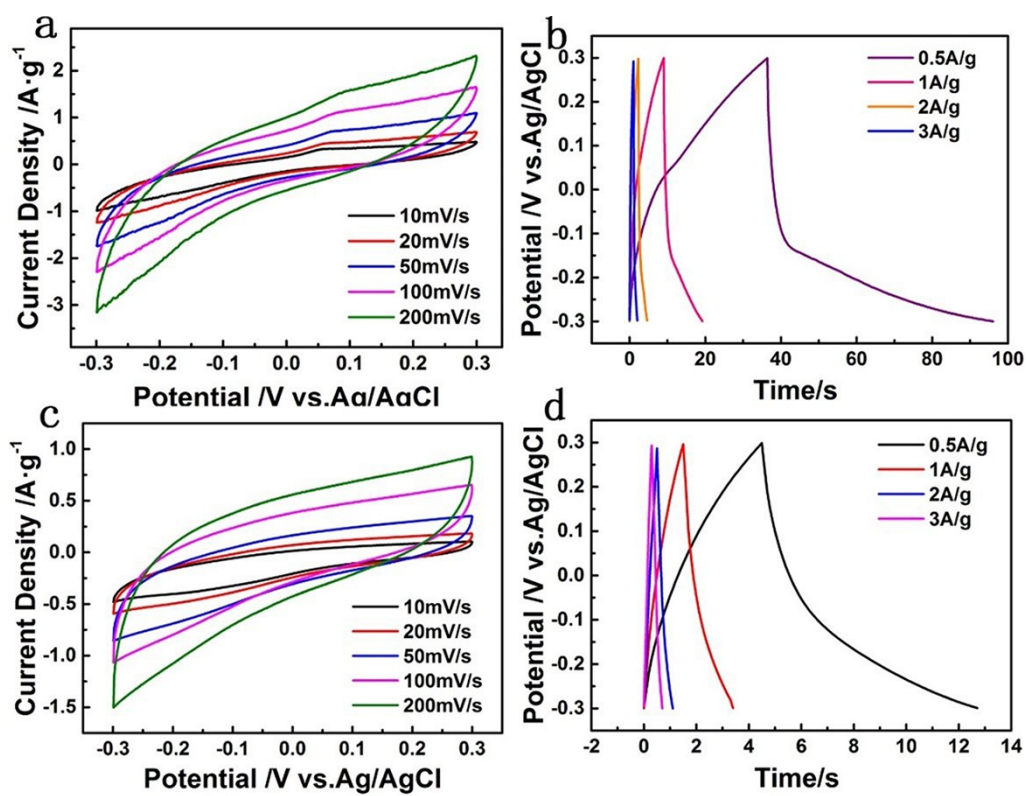

**Fig. S8** CV curves and GCD profiles for the (a, b) annealed 1T-MoS<sub>2</sub>, and (c, d) commercial MoS<sub>2</sub>, measured using a three-electrode system.

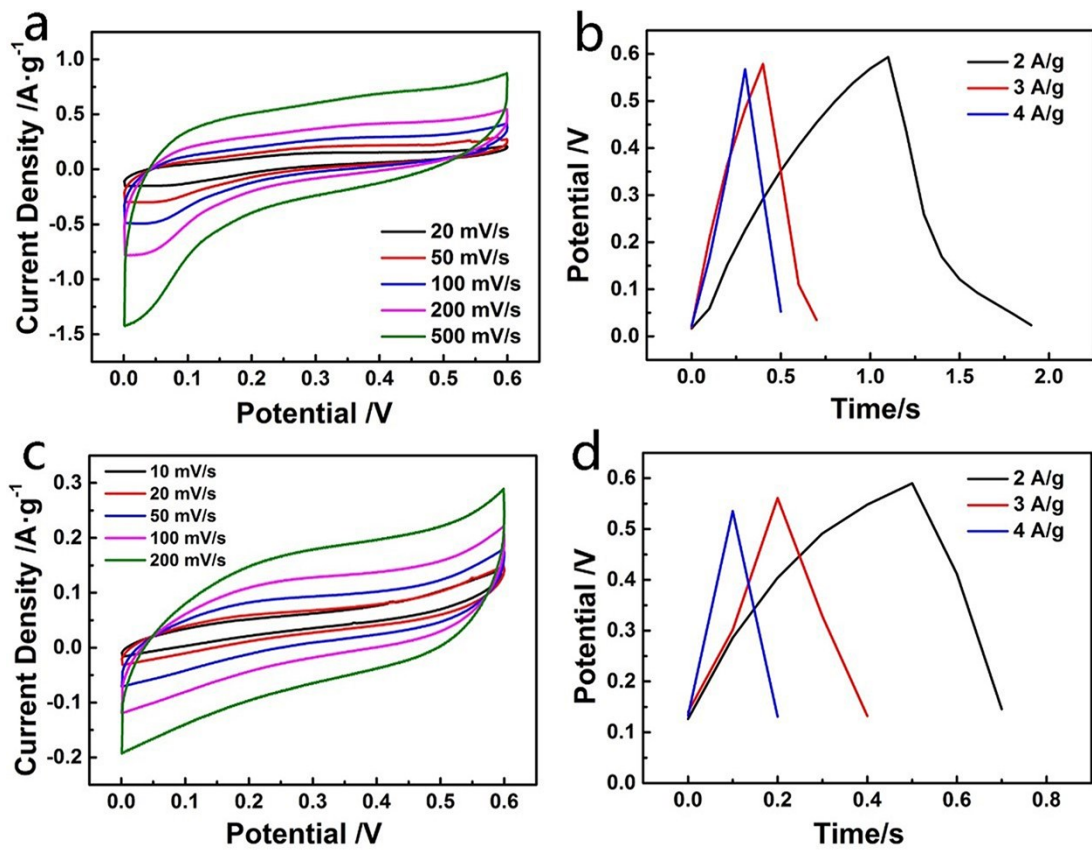

**Fig. S9** CV curves and GCD profiles for the (a, b) annealed 1T-MoS<sub>2</sub>, and (c, d) commercial MoS<sub>2</sub>, measured using a two-electrode symmetrical cell.

**Table S1** Local structural parameters for Mo and S atoms in commercial MoS<sub>2</sub>, annealed 1T-MoS<sub>2</sub> and as-prepared 1T-MoS<sub>2</sub> fitted from EXAFS data. R is the length of bond, N is the coordination number and  $\sigma^2$  is Debye-Waller factor.

| Sample                       | Path  | R (Å) | N   | $\sigma^2$ (10 <sup>-3</sup> Å) |
|------------------------------|-------|-------|-----|---------------------------------|
| Commercial MoS <sub>2</sub>  | Mo-S  | 2.41  | 6   | 3.6                             |
|                              | Mo-Mo | 1.37  | 6   | 3.1                             |
| Annealed 1T-MoS <sub>2</sub> | Mo-S  | 2.41  | 4.7 | 3.7                             |
|                              | Mo-Mo | 3.16  | 3.7 | 5.4                             |
| 1T-MoS <sub>2</sub>          | Mo-S  | 2.38  | 3.8 | 9.2                             |
|                              | Mo-Mo | 2.76  | 1.5 | 10.7                            |

**Table S2** Synthesis conditions and specific capacitances comparisons of various materials reported from references with our obtained 1T- MoS<sub>2</sub>.

| Materials                             | Synthesis Method  | Specific Capacitance              | Electrolyte                         | Ref.      |
|---------------------------------------|-------------------|-----------------------------------|-------------------------------------|-----------|
| MoS <sub>2</sub> nanosheet            | Hydrothermal      | 129.2 F/g (1 A/g)                 | 1 M Na <sub>2</sub> SO <sub>4</sub> | 1         |
| MoS <sub>2</sub> nanosheet            | Hydrothermal      | 8 mF/cm <sup>2</sup>              | 1 M Na <sub>2</sub> SO <sub>4</sub> | 2         |
| MoS <sub>2</sub> nanosheet            | Hydrothermal      | 92 F/g (0.5 mA/cm <sup>2</sup> )  | 1 M Na <sub>2</sub> SO <sub>4</sub> | 3         |
| MoS <sub>2</sub> nanosphere           | Hydrothermal      | 122 F/g (1 A/g)                   | 1 M KCl                             | 4         |
| 2D MoS <sub>2</sub> on graphene oxide | Microwave Heating | 265 F/g (10 mV/s)                 | 1 M HClO <sub>4</sub>               | 5         |
| Flower-like MoS <sub>2</sub>          | Hydrothermal      | 168 F/g (1 A/g)                   | 1 M KCl                             | 6         |
| MoS <sub>2</sub> nanosheet on Mo foil | Hydrothermal      | 192.7 F/g (1 mA/cm <sup>2</sup> ) | 1 M Na <sub>2</sub> SO <sub>4</sub> | 7         |
| MoS <sub>2</sub> nanosheet            | Solvothermal      | 231 F/g (1 A/g)                   | 1 M Na <sub>2</sub> SO <sub>4</sub> | 8         |
| MoS <sub>2</sub> nanosheet            | Solvothermal      | 348 F/g (1 A/g)                   | 1 M H <sub>2</sub> SO <sub>4</sub>  | This work |

**Table S3** Synthesis conditions and specific capacitances comparisons of various metal disulfides reported from references with our obtained 1T- MoS<sub>2</sub>.

| Materials                  | Synthesis Method     | Specific Capacitance                             | Electrolyte                              | Ref.      |
|----------------------------|----------------------|--------------------------------------------------|------------------------------------------|-----------|
| CoS <sub>2</sub>           | Microwave-mediated   | 119 F/g (1 A/g)                                  | 1 M LiPF <sub>6</sub> <sup>-</sup> based | 9         |
| CoS <sub>2</sub>           | Hydrothermal         | 236.5 F/g (1A/g)                                 | 2 M KOH                                  | 10        |
| NiS <sub>2</sub> /NiS      | Hydrothermal         | 717 F/g (0.6 A/g)                                | 3 M KOH                                  | 11        |
| NiS <sub>2</sub>           | Microwave-assisted   | 695 F/g (1.25 A/g)                               | 3 M KOH                                  | 12        |
| NiS <sub>2</sub> /graphene | Solvothermal         | 426 F/g (1A/g)                                   | 6 M KOH                                  | 13        |
| MnS <sub>2</sub>           | Hydrothermal         | 471 F/g (0.5 mA/cm <sup>2</sup> )                | -                                        | 14        |
| SnS <sub>2</sub>           | Solvothermal         | 216 F/g (0.38 A/g)                               | 1 M KCl                                  | 15        |
| WS <sub>2</sub>            | Hydrothermal         | 2813 μF/g (0.5 A/m <sup>2</sup> )                | 1 M H <sub>2</sub> SO <sub>4</sub>       | 16        |
| VS <sub>2</sub>            | Chemical exfoliating | 4760 μF /cm <sup>2</sup> (0.1 A/m <sup>2</sup> ) | BM1MBF <sub>4</sub> <sup>-</sup> PVA     | 17        |
| VS <sub>2</sub>            | Hydrothermal         | 155 F/g (1 mA/cm <sup>2</sup> )                  | 6 M KOH                                  | 18        |
| MoS <sub>2</sub> nanosheet | Solvothermal         | 348 F/g (1 A/g)                                  | 1 M H <sub>2</sub> SO <sub>4</sub>       | This work |



## Supplementary References

1. K.-J. Huang, J.-Z. Zhang, G.-W. Shi and Y.-M. Liu, *Electrochim. Acta*, 2014, **132**, 397-403.
2. Y. Gao, Y. S. Zhou, M. Qian, X. N. He, J. Redepenning, P. Goodman, H. M. Li, L. Jiang and Y. F. Lu, *Carbon*, 2013, **51**, 52-58.
3. K. Krishnamoorthy, G. K. Veerasubramani, S. Radhakrishnan and S. J. Kim, *Mater. Res. Bull.*, 2014, **50**, 499-502.
4. X. Zhou, B. Xu, Z. Lin, D. Shu and L. Ma, *J. nanosci. nanotechnol.*, 2014, **14**, 7250-7254.
5. E. G. da Silveira Firmiano, A. C. Rabelo, C. J. Dalmaschio, A. N. Pinheiro, E. C. Pereira, W. H. Schreiner and E. R. Leite, *Adv. Energ. Mater.*, 2014, **4**.
6. R. Wang, C. Xu, J. Sun, Y. Liu, L. Gao, H. Yao and C. Lin, *Nano Energy*, 2014, **8**, 183-195.
7. K. Krishnamoorthy, G. K. Veerasubramani, P. Pazhamalai and S. J. Kim, *Electrochim. Acta*, 2016, **190**, 305-312.
8. H. Xiao, S. Wang, S. Zhang, Y. Wang, Q. Xu, W. Hu, Y. Zhou, Z. Wang, C. An and J. Zhang, *Mater. Chem. Phys.*, 2017, **192**, 100-107.
9. S. Amaresh, K. Karthikeyan, I.-C. Jang and Y. Lee, *J. Mater. Chem. A*, 2014, **2**, 11099-11106.
10. J.-C. Xing, Y.-L. Zhu, Q.-W. Zhou, X.-D. Zheng and Q.-J. Jiao, *Electrochim. Acta*, 2014, **136**, 550-556.
11. C. Wei, C. Cheng, Y. Cheng, Y. Wang, Y. Xu, W. Du and H. Pang, *Dalton Trans.*, 2015, **44**, 17278-17285.
12. H. Pang, C. Wei, X. Li, G. Li, Y. Ma, S. Li, J. Chen and J. Zhang, *Sci. Rep.*, 2014, **4**, 3577.
13. X. Li, J. Shen, N. Li and M. Ye, *Mater. Lett.*, 2015, **139**, 81-85.
14. T. Chen, Y. Tang, Y. Qiao, Z. Liu, W. Guo, J. Song, S. Mu, S. Yu, Y. Zhao and F. Gao, *Sci. Rep.*, 2016, **6**, 23289.
15. R. K. Mishra, G. W. Baek, K. Kim, H.-I. Kwon and S. H. Jin, *Appl. Surf. Sci.*, 2017, **425**, 923-931.
16. A. Khalil, Q. Liu, Q. He, T. Xiang, D. Liu, C. Wang, Q. Fang and L. Song, *RSC Adv.*, 2016, **6**, 48788-48791.
17. J. Feng, X. Sun, C. Wu, L. Peng, C. Lin, S. Hu, J. Yang and Y. Xie, *J. Am. Chem. Soc.*, 2011, **133**, 17832-17838.
18. T. M. Masikhwa, F. Barzegar, J. K. Dangbegnon, A. Bello, M. J. Madito, D. Momodu and N. Manyala, *RSC Adv.*, 2016, **6**, 38990-39000.
